# Supplementary material
Source: publisher figshare collection journal article supplement (https://geolsoc.figshare.com/ndownloader/files/5426081)
Supplement: Supplementary file 1 [file 5426081]

Point	Coord y	Coord x	P	T in°C	CO2 g mq-1 day-1
1	N 38° 28' 49.3"	E O 22° 30' 26.5"	962.20	33	7.168
2	N 38° 28' 49.4"	E O 22° 30' 26.8"	962.20	33	4.480
3	N 38° 28' 48.6"	E O 22° 30' 26.8"	962.20	33	6.400
4	N 38° 28' 48.5"	E O 22° 30' 27.6	962.20	33	8.832
5	N 38° 28' 49.1"	E O 22° 30' 28.2	962.20	33	4.096
6	N 38° 28' 48"	E O 22° 30' 28.3	962.20	33	5.632
7	N 38° 28' 48.3"	E O 22° 30' 29.3	961.80	33	7.040
8	N 38° 28' 49.4"	E O 22° 30' 30.3	961.80	33	6.528
9	N 38° 28' 48.3"	E O 22° 30' 30.7	961.90	33	5.120
10	N 38° 28' 48.3"	E O 22° 30' 31.8	962.00	33	7.808
11	N 38° 28' 49"	E O 22° 30' 31.3	961.40	33	6.400
12	N 38° 28' 48.8	E O 22° 30' 32.5	961.10	33	7.040
13	N 38° 28' 47.9	E O 22° 30' 31.8	961.90	33	5.248
14	N 38° 28' 47.8	E O 22° 30' 23.8	962.00	33	6.016
15	N 38° 28' 48.3"	E O 22° 30' 28.3	962.00	33	4.480
16	N 38° 28' 49.1"	E O 22° 30' 29.1	961.70	33	4.608
17	N 38° 28' 48.2	E O 22° 30' 26.5"	962.20	33	4.480
18	N 38° 28' 49.5	E O 22° 30' 25	962.10	33	3.968
19	N 38° 29. 102'	E O 22° 30.056'	956.90	33	7.296
20	N 38° 29. 098'	E O 22° 30.032'	956.50	33	4.864
21	N 38° 29. 092'	E O 22° 30.031'	956.50	33	4.224
22	N 38° 29. 088'	E O 22° 30.000	956.50	33	8.320
23	N 38° 29. 082	E O 22° 29.981	956.50	33	5.376
24	N 38° 29. 093'	E O 22° 29.987	955.60	33	3.072
25	N 38° 29. 102'	E O 22° 30.001	955.30	33	8.320
26	N 38° 29. 104'	E O 22° 30.021	955.60	33	7.680
27	N 38° 29. 111'	E O 22° 30.041	956.00	33	7.040
28	N 38° 29. 111'	E O 22° 30.021	955.00	33	5.504
29	N 38° 29. 109'	E O 22° 30.010	955.00	33	7.680
30	N 38° 29. 107'	E O 22° 29.998	954.90	33	4.864
31	N 38° 29. 114'	E O 22° 29.985	954.50	33	4.480
32	N 38° 29. 110'	E O 22° 29.985	954.40	33	4.864
33	N 38° 29. 101'	E O 22° 29.974	954.90	33	4.736
34	N 38° 29. 090'	E O 22° 29.974	955.30	33	7.040
35	N 38° 29. 105'	E O 22° 29.958	954.00	33	5.504
36	N 38° 29. 117'	E O 22° 29.975	954.00	33	7.168
37	N 38° 29. 121'	E O 22° 29.979	953.80	33	7.296
38	N 38° 29. 121'	E O 22° 29.979	954.00	33	2.688
39	N 38° 29. 126'	E O 22° 29.996	954.00	33	6.528
40	N 38° 29. 124'	E O 22° 29.994	954.00	33	8.064
41	N 38° 29. 129'	E O 22° 30.008	954.00	33	6.528
42	N 38° 29. 143'	E O 22° 30.009	953.70	33	4.864
43	N 38° 29. 142'	E O 22° 30.017	954.00	33	5.120
44	N 38° 29. 112'	E O 22° 29.009	953.40	33	5.120
45	N 38° 29. 122'	E O 22° 29.999	953.10	33	3.968
46	N 38° 29. 132'	E O 22° 30.018	953.00	33	7.296
47	N 38° 29. 130'	E O 22° 30.024	953.00	33	4.992
48	N 38° 29. 141'	E O 22° 30.029	953.00	33	4.736
49	N 38° 29. 153'	E O 22° 30.021	951.90	33	8.192
50	N 38° 29. 151'	E O 22° 29.998	952.00	33	6.784
51	N 38° 29. 146'	E O 22° 30.005	952.00	33	3.200
52	N 38° 29. 147'	E O 22° 29.992	952.00	33	8.064
53	N 38° 29. 128'	E O 22° 29.981	952.20	33	9.216
54	N 38° 29. 119'	E O 22° 29.970	952.20	33	6.016
55	N 38° 29. 114'	E O 22° 29.963	952.20	33	7.680
56	N 38° 29. 124'	E O 22° 29.956	952.20	33	5.376
57	N 38° 29. 136'	E O 22° 29.977	952.20	33	7.808
58	N 38° 29. 126'	E O 22° 29.953	952.20	33	3.200
59	N 38° 29. 116'	E O 22° 29.949	952.20	33	4.864
60	N 38° 29. 191'	E O 22° 30.218	953.70	33	4.352
61	N 38° 29. 199'	E O 22° 30.211	956.30	33	2.816
62	N 38° 29. 157'	E O 22° 30.008	952.20	33	5.504
63	N 38° 29. 161'	E O 22° 30.019	954.00	33	7.296
64	N 38° 29. 174'	E O 22° 30.022	952.00	33	7.936
65	N 38° 29. 160'	E O 22° 30.002	952.00	33	4.352
66	N 38° 29. 156'	E O 22° 30.000	952.00	33	3.968
67	N 38° 29. 139'	E O 22° 29.972	952.00	33	7.296
68	N 38° 29. 150'	E O 22° 29.974	951.50	33	5.120
69	N 38° 29. 152'	E O 22° 29.982	952.00	33	7.424
70	N 38° 29. 148'	E O 22° 29.961	951.40	33	7.808
71	N 38° 29. 145'	E O 22° 29.963	937.90	33	4.224
72	N 38° 29. 128'	E O 22° 29.943	951.50	33	4.864
73	N 38° 29. 158'	E O 22° 29.949	950.30	33	4.224
74	N 38° 29. 155'	E O 22° 29.930	949.70	33	6.656
75	N 38° 29. 142'	E O 22° 29.924	950.00	33	7.680
76	N 38° 29. 122'	E O 22° 29.911	950.00	33	7.680
77	N 38° 29. 200'	E O 22° 29.952	947.60	33	6.784
78	N 38° 29. 178'	E O 22° 29.917	947.40	33	4.608
79	N 38° 29. 151'	E O 22° 29.897	947.40	33	5.248
80	N 38° 29. 153'	E O 22° 29.856	946.50	33	5.120
81	N 38° 29. 175'	E O 22° 29.839	945.40	33	5.120
82	N 38° 29. 158'	E O 22° 29.778	945.30	33	4.480
83	N 38° 29. 158'	E O 22° 29.778	945.30	33	6.016
84	N 38° 29. 123'	E O 22° 29.726	945.10	33	5.120
85	N 38° 29. 142'	E O 22° 29.712	942.30	33	2.944
86	N 38° 29. 186'	E O 22° 29.719	939.80	33	4.864
87	N 38° 29. 206'	E O 22° 29.698	940.00	33	7.296
88	N 38° 29. 199'	E O 22° 29.766	940.00	33	6.400
89	N 38° 29. 198'	E O 22° 29.826	943.40	33	3.712
90	N 38° 29. 110'	E O 22° 29.814	948.40	33	7.040
91	N 38° 29. 043'	E O 22° 29.777	948.20	33	7.680
92	N 38° 29. 087'	E O 22° 29.841	951.10	33	8.576
93	N 38° 29. 022'	E O 22° 29.825	952.00	33	3.072
94	N 38° 29. 089'	E O 22° 29.907	952.00	33	3.968
95	N 38° 29. 054'	E O 22° 29.937	956.40	33	4.480
96	N 38° 29. 120'	E O 22° 30.084	954.40	33	6.400
97	N 38° 29. 134'	E O 22° 30.142	957.90	33	4.096
98	N 38° 29. 110'	E O 22° 30.289	961.00	33	6.400
99	N 38° 29. 104'	E O 22° 30.343	960.00	33	8.064
100	N 38° 29. 105'	E O 22° 30.274	963.20	33	3.200
101	N 38° 29. 062'	E O 22° 30.308	963.20	33	2.944
102	N 38° 29. 089'	E O 22° 30.274	963.20	33	7.936
103	N 38° 29. 119'	E O 22° 30.248	964.00	33	8.576
104	N 38° 29. 152'	E O 22° 30.217	964.00	33	7.680
105	N 38° 29. 115'	E O 22° 30.220	964.40	33	5.760
106	N 38° 29. 086'	E O 22° 30.251	964.40	33	7.424
107	N 38° 29. 060'	E O 22° 30.270	964.40	33	7.296
108	N 38° 29. 075'	E O 22° 30.272	964.00	33	4.096
109	N 38° 29. 094'	E O 22° 30.253	964.00	33	3.840
110	N 38° 29. 037'	E O 22° 30.327	964.80	33	5.760
111	N 38° 29. 020'	E O 22° 30.357	965.70	33	6.144
112	N 38° 29. 008'	E O 22° 30.394	966.00	33	7.168
113	N 38° 29. 017'	E O 22° 30.307	966.40	33	4.224
114	N 38° 29. 033'	E O 22° 30.270	966.40	33	5.248
115	N 38° 29. 000'	E O 22° 30.416	966.30	33	8.320
116	N 38° 28. 977'	E O 22° 30.447	966.60	33	6.784
117	N 38° 28. 961'	E O 22° 30.472	968.60	33	8.064
118	N 38° 28. 927'	E O 22° 30.467	970.80	33	3.968
119	N 38° 28. 951'	E O 22° 30.415	969.70	33	4.608
120	N 38° 28.988'	E O 22° 30.362	966.80	33	4.352
121	N 38° 29. 019'	E O 22° 30.296	967.00	33	5.120
122	N 38° 29. 017'	E O 22° 30.241	967.50	33	7.168
123	N 38° 29. 042'	E O 22° 30.396	963.20	33	6.784
124	N 38° 29. 032'	E O 22° 30.439	962.80	33	3.456
125	N 38° 29. 051'	E O 22° 30.450	960.50	33	4.224
126	N 38° 29. 053'	E O 22° 30.362	961.00	33	4.096
127	N 38° 29. 200'	E O 22° 30.254	959.20	33	5.120
128	N 38° 29. 179'	E O 22° 30.283	958.70	33	6.656
129	N 38° 29. 179'	E O 22° 30.283	958.70	33	6.784
130	N 38° 28. 838'	E O 22° 29.832	962.10	33	4.352
131	N 38° 28. 886'	E O 22° 29.993	966.40	33	8.064
132	N 38° 28. 955'	E O 22° 30.009	965.10	33	8.192
133	N 38° 29. 004'	E O 22° 30.022	964.90	33	7.680
134	N 38° 29. 035'	E O 22° 30.062	964.30	33	5.120
135	N 38° 29. 085'	E O 22° 30.159	964.30	33	5.248
136	N 38° 29. 126'	E O 22° 30.197	964.30	33	5.120
137	N 38° 29. 050'	E O 22° 30.172	966.60	33	6.400
138	N 38° 29. 046'	E O 22° 30.145	967.00	33	5.120
139	N 38° 28. 881'	E O 22° 30.837	960.00	33	4.864
140	N 38° 28. 928'	E O 22° 29.910	960.50	33	7.040
141	N 38° 28. 878'	E O 22° 29.763	959.20	33	5.376
142	N 38° 28. 869'	E O 22° 29.783	960.00	33	5.888
143	N 38° 28. 988'	E O 22° 29.334	960.00	33	5.888
144	N 38° 28. 985'	E O 22° 29.286	960.00	33	3.968
145	N 38° 29. 005'	E O 22° 30.745	962.10	33	4.736
146	N 38° 28. 998'	E O 22° 30.750	962.50	33	7.168
